# Supplementary material for: Standardizing disease-specific quality of life measures across multiple chronic conditions: development and initial evaluation of the QOL Disease Impact Scale (QDIS®)
Source: PubMed Central journal article supplement (PMC4890258; doi:10.1186/s12955-016-0483-x), 2016-06-02
Supplement: 12955_2016_483_MOESM5_ESM.pdf [file 12955_2016_483_MOESM5_ESM.pdf]

**Additional File 5: Table S3** Correlations Among Disease-Specific and Standardized IRT Parameters<sup>a</sup>

| Disease        | Slopes    |       |                 |           |              | Thresholds |       |                 |           |              |
|----------------|-----------|-------|-----------------|-----------|--------------|------------|-------|-----------------|-----------|--------------|
|                | Arthritis | CKD   | Cardio-vascular | Dia-betes | Respi-ratory | Arthritis  | CKD   | Cardio-vascular | Dia-betes | Respi-ratory |
| CKD            | 0.786     |       |                 |           |              | 0.904      |       |                 |           |              |
| Cardiovascular | 0.834     | 0.811 |                 |           |              | 0.968      | 0.913 |                 |           |              |
| Diabetes       | 0.801     | 0.841 | 0.826           |           |              | 0.918      | 0.916 | 0.923           |           |              |
| Respiratory    | 0.878     | 0.793 | 0.892           | 0.803     |              | 0.983      | 0.913 | 0.978           | 0.918     |              |
| Standardized   | 0.934     | 0.877 | 0.928           | 0.897     | 0.957        | 0.993      | 0.930 | 0.984           | 0.942     | 0.992        |

Abbreviations: CKD chronic kidney disease

Sample size: Arthritis N=1,574; CKD N=299; Cardiovascular N=639; Diabetes N=1,326; Respiratory N=1,580; Standardized (total combined across diseases) N=5,418.

<sup>a</sup> All entries are product-moment correlations. Correlations between disease-specific and standardized parameters are not independent.

Source: Ware JE, Gandek B, Guyer R, Deng N. Standardizing Disease-specific Quality of Life Measures Across Multiple Chronic Conditions: Development and Initial Evaluation of the QOL Disease Impact Scale (QDIS®). *Health and Quality of Life Outcomes*, 2016.
