# Supplementary material for: Standardizing disease-specific quality of life measures across multiple chronic conditions: development and initial evaluation of the QOL Disease Impact Scale (QDIS®)
Source: Springer Nature journal article supplement (doi:10.1186/s12955-016-0483-x), 2016-06-02
Supplement: MOESM1 [file 10244446]

**Additional File 1: Table S1** Comparison of Relative Validity (RV) of QDIS (7-item Static and 6-item CAT) and Generic Measures in Discriminating Across Severity Levels, Five Disease Groups

| Disease/<br>Measure   | Mean (SD) by Self-Evaluated Severity <sup>a</sup> |              |              | F-ratio | RV <sup>b</sup> | 95% CI <sup>c</sup> |
|-----------------------|---------------------------------------------------|--------------|--------------|---------|-----------------|---------------------|
|                       | Mild                                              | Moderate     | Severe       |         |                 |                     |
| Arthritis             | (N=499)                                           | (N=406)      | (N=158)      |         |                 |                     |
| QDIS-7 <sup>d</sup>   | 48.8 (7.04)                                       | 57.0 (5.99)  | 65.1 (5.85)  | 434.04  | 1.00            |                     |
| CAT-6 <sup>d</sup>    | 49.4 (7.17)                                       | 57.1 (5.64)  | 64.4 (5.70)  | 379.44  | 0.87            | (.83, .93)          |
| SF-8 PCS <sup>e</sup> | 47.9 (7.73)                                       | 41.2 (8.59)  | 31.3 (8.39)  | 262.63  | 0.61            | (.50, .72)          |
| SF-8 MCS <sup>e</sup> | 51.3 (8.58)                                       | 48.6 (10.02) | 43.7 (11.47) | 38.50   | 0.09            | (.05, .14)          |
| CKD                   | (N=173)                                           | (N=46)       | (N=30)       |         |                 |                     |
| QDIS-7                | 44.3 (6.91)                                       | 52.0 (7.26)  | 61.2 (8.72)  | 79.21   | 1.00            |                     |
| CAT-6                 | 44.8 (7.02)                                       | 52.0 (7.07)  | 61.0 (7.91)  | 74.39   | 0.94            | (.84, 1.07)         |
| SF-8 PCS              | 42.3 (11.17)                                      | 37.1 (10.66) | 32.9 (7.18)  | 12.20   | 0.15            | (.07, .31)          |
| SF-8 MCS              | 50.3 (9.19)                                       | 46.3 (11.29) | 44.3 (11.80) | 6.71    | 0.08            | (.02, .19)          |
| Cardiovascular        | (n = 431)                                         | (n = 97)     | (n = 32)     |         |                 |                     |
| QDIS-7                | 48.4 (8.79)                                       | 58.9 (6.63)  | 65.3 (5.40)  | 113.33  | 1.00            |                     |
| CAT-6                 | 48.8 (9.03)                                       | 58.8 (6.72)  | 65.3 (5.20)  | 100.47  | 0.89            | (.82, .94)          |
| SF-8 PCS              | 41.8 (10.25)                                      | 34.1 (8.57)  | 30.0 (7.34)  | 40.59   | 0.36            | (.23, .52)          |
| SF-8 MCS              | 49.9 (9.55)                                       | 46.5 (10.41) | 39.7 (11.51) | 18.83   | 0.17            | (.07, .30)          |
| Diabetes              | (N=569)                                           | (N=212)      | (N=45)       |         |                 |                     |
| QDIS-7                | 44.4 (6.42)                                       | 51.2 (7.63)  | 58.9 (5.95)  | 152.73  | 1.00            |                     |
| CAT-6                 | 44.5 (6.23)                                       | 51.0 (7.52)  | 58.0 (6.43)  | 142.47  | 0.93            | (.86, 1.01)         |
| SF-8 PCS              | 48.3 (8.91)                                       | 44.1 (9.97)  | 40.9 (11.41) | 25.25   | 0.17            | (.08, .27)          |
| SF-8 MCS              | 51.5 (8.32)                                       | 47.7 (10.18) | 42.3 (12.00) | 31.08   | 0.20            | (.11, .33)          |
| Respiratory           | (N=809)                                           | (N=230)      | (N=83)       |         |                 |                     |
| QDIS-7                | 44.1 (7.07)                                       | 56.2 (6.67)  | 64.9 (7.26)  | 524.31  | 1.00            |                     |
| CAT-6                 | 44.5 (7.08)                                       | 56.4 (6.60)  | 64.1 (6.86)  | 488.29  | 0.93            | (.89, .98)          |
| SF-8 PCS              | 47.9 (9.57)                                       | 41.3 (10.34) | 32.8 (10.29) | 114.33  | 0.22            | (.16, .28)          |
| SF-8 MCS              | 49.2 (9.56)                                       | 46.2 (11.76) | 40.8 (11.80) | 29.14   | 0.06            | (.03, .09)          |

Abbreviations: CKD chronic kidney disease

<sup>a</sup> Severity defined as Mild (None, Mild), Moderate, or Severe (Severe, Very Severe) in response to item *How would you rate the severity of your <condition> in the past 4 weeks?*

<sup>b</sup> Relative validity (RV) is computed as the ratio of the comparator F-statistic over the QDIS-7 F-statistic.

<sup>c</sup> Comparator confidence intervals (CI) estimated using bootstrap.

<sup>d</sup> QDIS-7 and CAT-6 scored so a higher score equals worse health.

<sup>e</sup> Norm-based scoring of SF-8 Health Survey summary measures based on a representative probability sample of the US general household population surveyed in 2011, scored so a higher score equals better health.

Source: Ware JE, Gandek B, Guyer R, Deng N. Standardizing Disease-specific Quality of Life Measures Across Multiple Chronic Conditions: Development and Initial Evaluation of the QOL Disease Impact Scale (QDIS®). *Health and Quality of Life Outcomes*, 2016.
