# Supplementary material for: Standardizing disease-specific quality of life measures across multiple chronic conditions: development and initial evaluation of the QOL Disease Impact Scale (QDIS®)
Source: Springer Nature journal article supplement (doi:10.1186/s12955-016-0483-x), 2016-06-02
Supplement: MOESM2 [file 10244446]

**Additional File 2: Table S2** Correlations of QDIS-7 (7-item Static and 6-item CAT) with Disease-Specific and Generic Measures, Five Disease Groups

| Disease Group  | N   | Disease-specific severity <sup>a</sup> | Disease-specific QOL <sup>b</sup> | Generic Physical <sup>c</sup> | Generic Mental <sup>c</sup> |
|----------------|-----|----------------------------------------|-----------------------------------|-------------------------------|-----------------------------|
| Arthritis      |     |                                        |                                   |                               |                             |
| QDIS-7         | 925 | 0.72                                   | 0.71                              | -0.69                         | -0.44                       |
| CAT-6          | 925 | 0.70                                   | 0.70                              | -0.68                         | -0.43                       |
| CKD            |     |                                        |                                   |                               |                             |
| QDIS-7         | 240 | 0.66                                   | 0.83                              | -0.44                         | -0.43                       |
| CAT-6          | 240 | 0.65                                   | 0.82                              | -0.44                         | -0.43                       |
| Cardiovascular |     |                                        |                                   |                               |                             |
| QDIS-7         | 542 | 0.65                                   | 0.72, 0.79                        | -0.52                         | -0.51                       |
| CAT-6          | 542 | 0.63                                   | 0.72, 0.78                        | -0.52                         | -0.50                       |
| Diabetes       |     |                                        |                                   |                               |                             |
| QDIS-7         | 695 | 0.54                                   | 0.72, 0.72                        | -0.43                         | -0.49                       |
| CAT-6          | 695 | 0.53                                   | 0.70, 0.71                        | -0.43                         | -0.49                       |
| Respiratory    |     |                                        |                                   |                               |                             |
| QDIS-7         | 848 | 0.74                                   | 0.83                              | -0.58                         | -0.38                       |
| CAT-6          | 848 | 0.73                                   | 0.83                              | -0.59                         | -0.38                       |

Correlations between QDIS-7 and CAT-6 measures were arthritis (0.97), CKD (0.97), cardiovascular (0.98), diabetes (0.97), and respiratory (0.98). QDIS-7 scored so a higher score equals worse health.

*Abbreviations:* CKD chronic kidney disease

<sup>a</sup> Self-rating of disease severity (5 categories, None-Very Severe).

<sup>b</sup> Disease-specific QOL measures are Arthritis: Western Ontario and McMaster Universities Osteoarthritis Index (WOMAC<sup>®</sup>) Total scale [6]; CKD: Kidney-Disease Quality of Life 36-item instrument (KDQOL-36<sup>™</sup>) Burden scale [11]; Cardiovascular: Angina/MI-Seattle Angina Questionnaire Quality of Life scale [38] (first entry n=275) and CHF-Minnesota Living with Heart Failure<sup>®</sup> Questionnaire total scale [39] (second entry, n=267); Diabetes: Problem Areas in Diabetes Scale total scale [41] (first entry) and Diabetes Quality of Life measure total scale [40] (second entry); Respiratory: St. George's Respiratory Questionnaire total scale [7]. All disease-specific measures are scored so a higher score equals worse health.

<sup>c</sup> SF-8 Health Survey physical and mental component summary measures scored so a higher score equals better health.

Source: Ware JE, Gandek B, Guyer R, Deng N. Standardizing Disease-specific Quality of Life Measures Across Multiple Chronic Conditions: Development and Initial Evaluation of the QOL Disease Impact Scale (QDIS<sup>®</sup>). *Health and Quality of Life Outcomes*, 2016.
