# Supplementary material for: Standardizing disease-specific quality of life measures across multiple chronic conditions: development and initial evaluation of the QOL Disease Impact Scale (QDIS®)
Source: Springer Nature journal article supplement (doi:10.1186/s12955-016-0483-x), 2016-06-02
Supplement: MOESM6 [file 10244446]

**Additional File 6: Figure S3** Plots of QDIS Theta Scores Estimated Using Disease-specific and Standardized Parameters

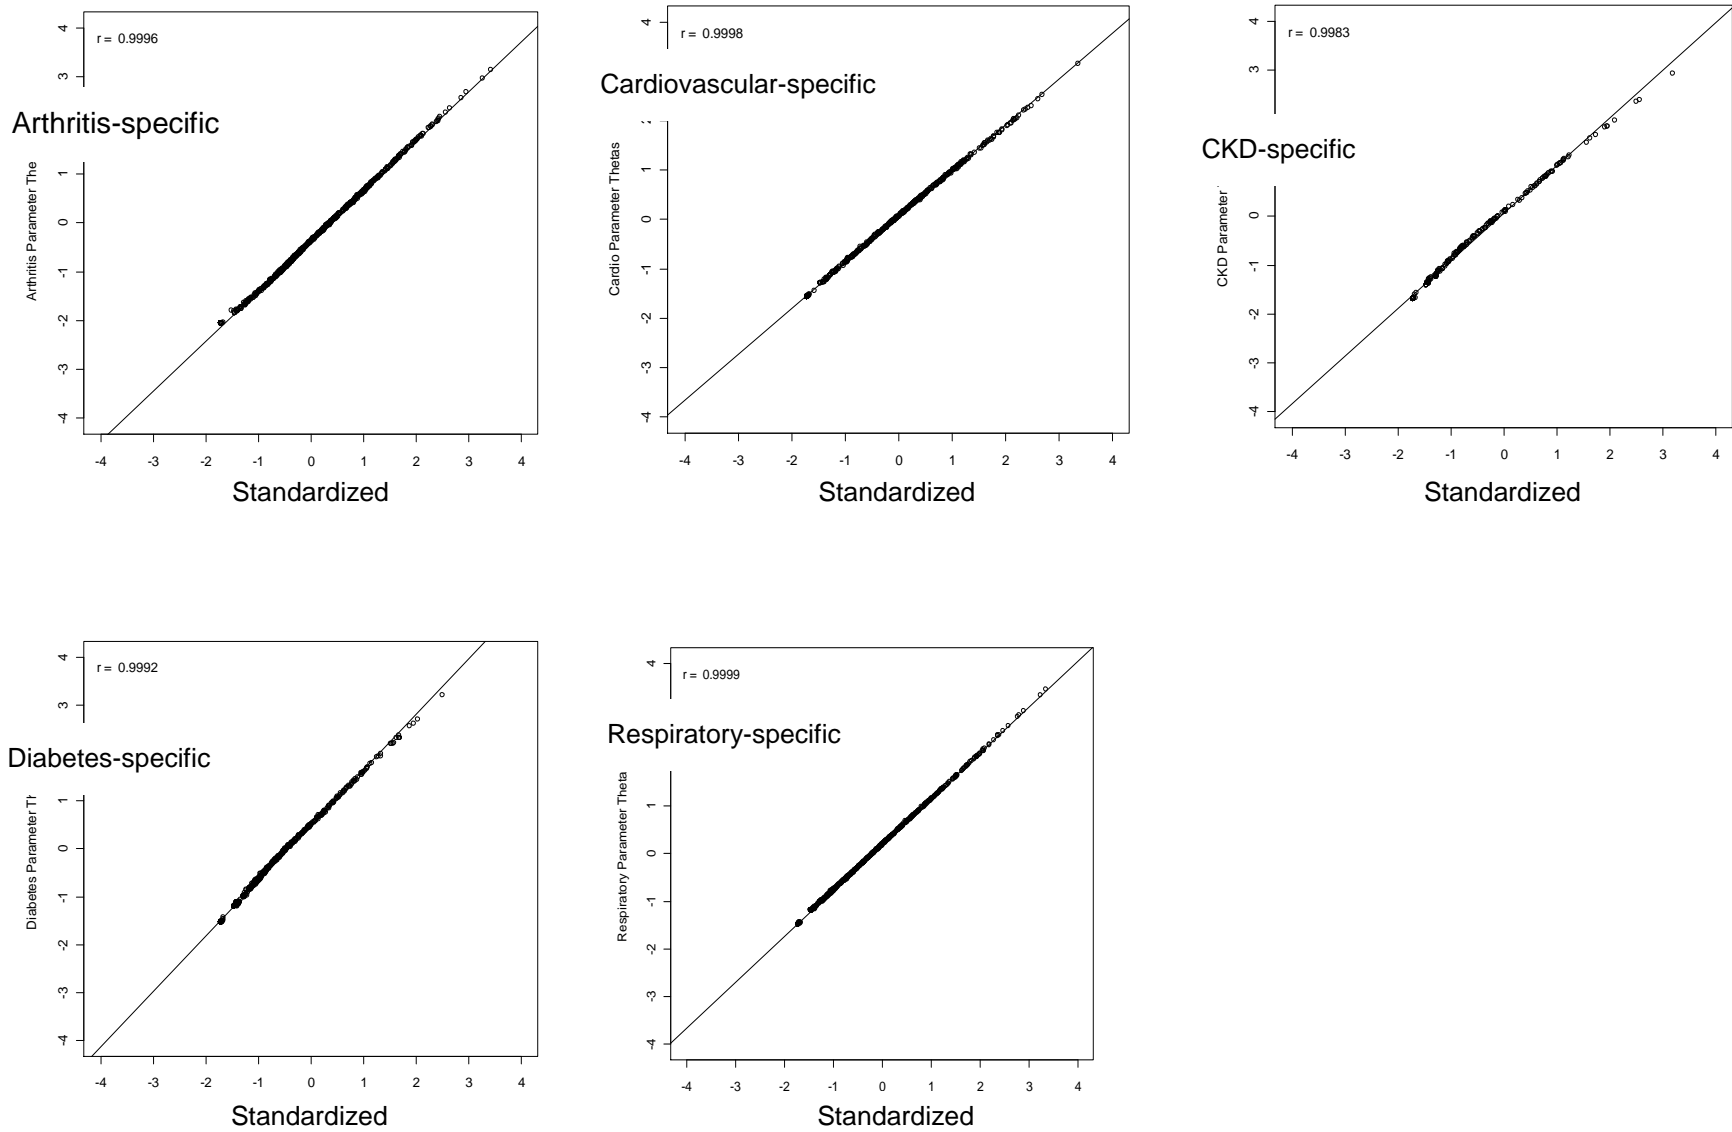

Source: Ware JE, Gandek B, Guyer R, Deng N. Standardizing Disease-specific Quality of Life Measures Across Multiple Chronic Conditions: Development and Initial Evaluation of the QOL Disease Impact Scale (QDIS®). *Health and Quality of Life Outcomes*, 2016
