# Supplementary material for: Standardizing disease-specific quality of life measures across multiple chronic conditions: development and initial evaluation of the QOL Disease Impact Scale (QDIS®)
Source: Springer Nature journal article supplement (doi:10.1186/s12955-016-0483-x), 2016-06-02
Supplement: MOESM7 [file 10244446]

**Additional File 7: Figure S4** Plot of QDIS-7 Medians and Ranges for Standardized Scores and Percentile Ranks by Severity Level, All Disease Groups Combined

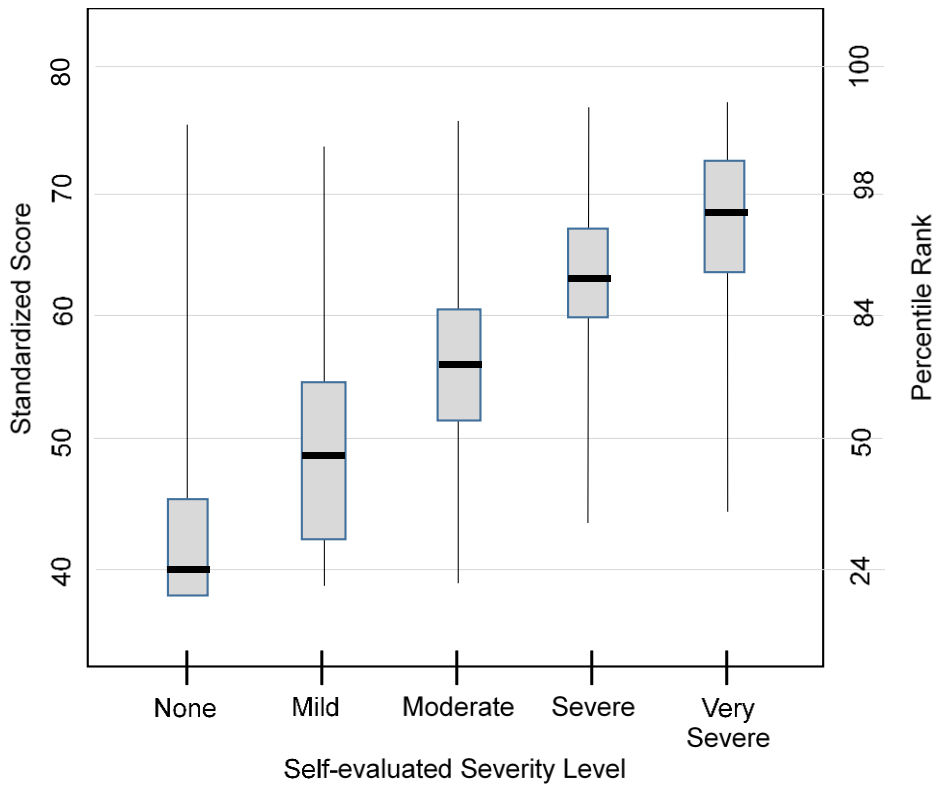

**Note:** Bold lines are medians; vertical lines are observed ranges; gray boxes are interquartile ranges.

|                    | Severity Level |           |           |           |             |
|--------------------|----------------|-----------|-----------|-----------|-------------|
|                    | None           | Mild      | Moderate  | Severe    | Very Severe |
| N                  | 1,205          | 2,271     | 1,396     | 382       | 97          |
| Mean               | 42.43          | 48.38     | 55.79     | 62.68     | 67.86       |
| Standard deviation | 5.97           | 7.21      | 7.02      | 6.06      | 7.21        |
| 25th percentile    | 38.08          | 42.06     | 51.83     | 59.67     | 63.28       |
| 50th percentile    | 39.76          | 48.85     | 56.25     | 63.15     | 68.48       |
| 75th percentile    | 45.62          | 53.70     | 60.80     | 66.63     | 73.10       |
| Range              | 38.1-77.3      | 38.1-74.0 | 38.1-76.0 | 43.0-77.3 | 42.9-77.3   |
| % ceiling (worst)  | <1             | 0         | 0         | <1        | 16.5        |
| % floor (best)     | 45.9           | 16.3      | 14        | <1        | <1          |

Source: Ware JE, Gandek B, Guyer R, Deng N. Standardizing Disease-specific Quality of Life Measures Across Multiple Chronic Conditions: Development and Initial Evaluation of the QOL Disease Impact Scale (QDIS®). *Health and Quality of Life Outcomes*, 2016.
